# Supplementary material
Source: publisher figshare collection journal article supplement (https://acs.figshare.com/ndownloader/files/18024032)
Supplement: Supplementary file 1 [file 18024032]

## **Supporting Information**

### **Liquid-Phase Exfoliation of Kaolinite by High-Shear Mixer with Graphite Oxide as an Amphiphilic Dispersant**

Xiaohui Huang, Yuewei Li, Xianglu Yin, Jie Tian, Wei Wu \*

\* Research Center of the Ministry of Education for High Gravity of Engineering and Technology, Beijing University of Chemical Technology, Beijing 100029, China

\* Corresponding authors.

E-mail address: [wuwei@mail.buct.edu.cn](mailto:wuwei@mail.buct.edu.cn) (W. Wu).

Number of pages: 6

Number of figures: 9

Number of tables: 2

## Preparation of Graphite oxide

Graphite oxide was prepared according to the modified Hummers method. Graphite powder (5.0 g) and  $\text{NaNO}_3$  (2.5 g) were mixed with 120 mL cold 98%  $\text{H}_2\text{SO}_4$  into a 1000 mL beaker and stirred for a while in an ice bath.  $\text{KMnO}_4$  (15 g) was slowly added into the beaker (within 10 min) and stirred for 2 h in an ice bath. Subsequently, the reaction system was transferred into a  $\sim 35^\circ\text{C}$  water bath for 2 h, followed by the slow addition of 200 mL deionized water in an ice water bath. Afterward, the reaction continued for 1.5 h at  $98^\circ\text{C}$ . After the reaction was completed, add deionized water to 1000 mL and removal of residual  $\text{MnO}_4^-$  by adding 30 mL  $\text{H}_2\text{O}_2$ . Then, the fresh-keeping film was sealed and kept for one night. The resultant brilliant yellow mixture was filtered and rinsed with 1 mol/L  $\text{HCl}$  to remove residual metal ions. The solid phase was washed repeatedly with deionized water until a neutral pH was observed. Finally, the solid was freeze dried to obtain Graphite oxide.

The linear standard curve was  $A=0.07173C$  ( $R^2 = 0.99935$ ), where A is the absorbance of MB, C (mg/L) is the concentration of MB solution.

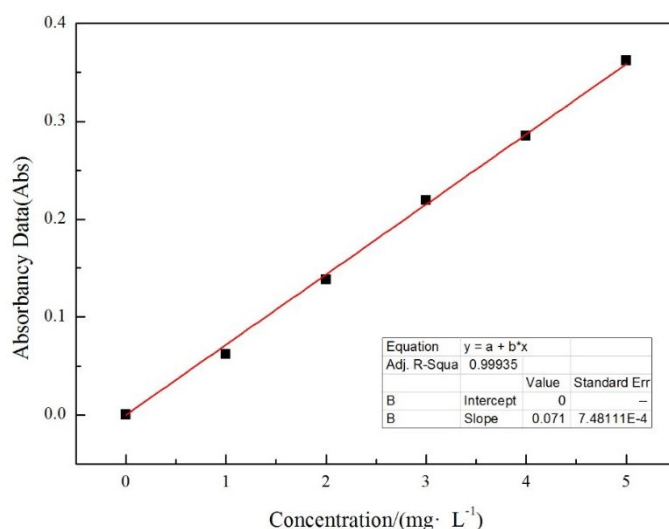

**Figure S1.** The standard curve of the methylene blue solution.

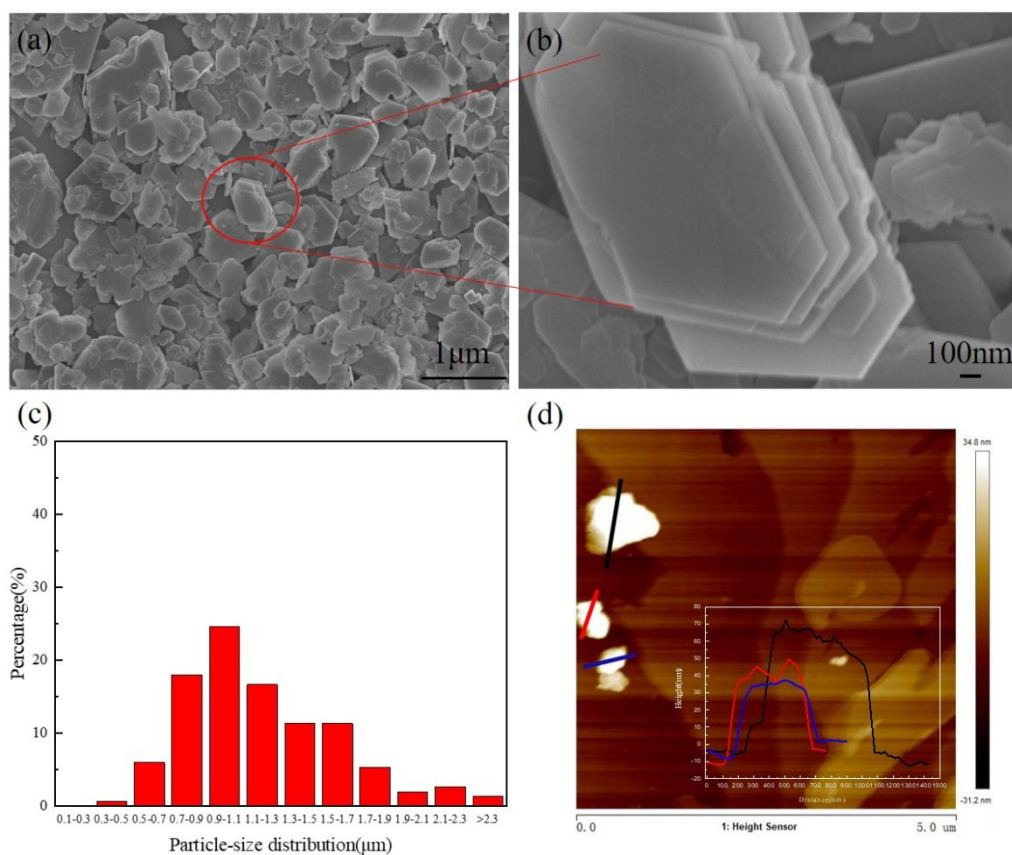

**Figure S2.** SEM images: (a) raw kaolinite with low magnification, (b) raw kaolinite with high magnification, (c) the histogram of statistical size; (d) AFM images of raw kaolinite.

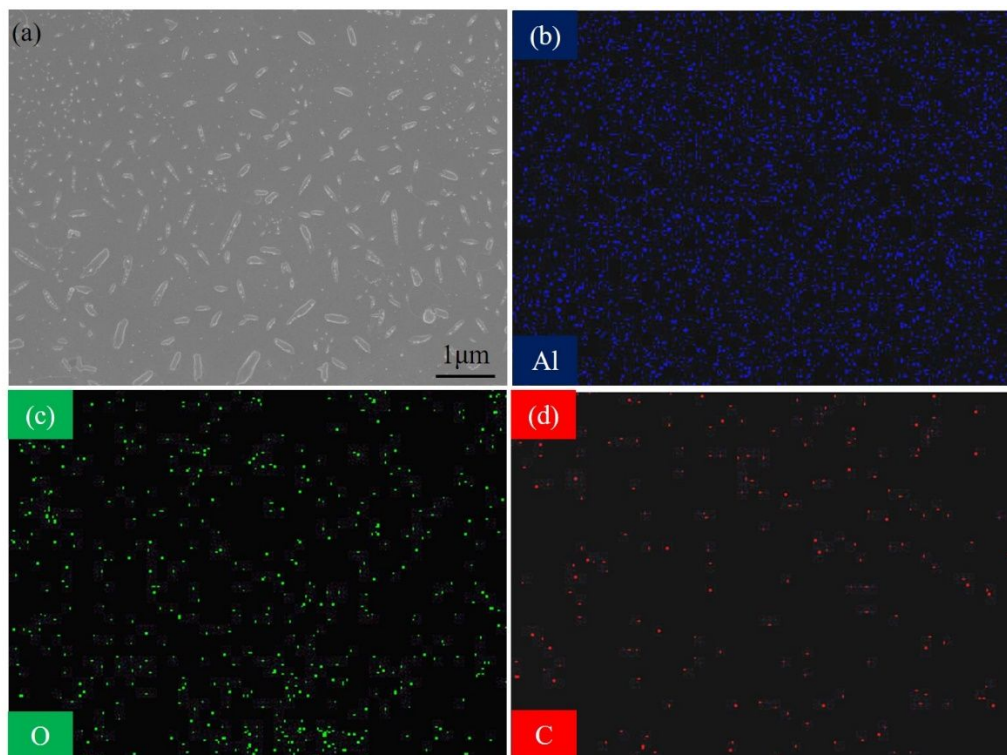

**Figure S3.** EDS elemental mapping of 5-G/K/S.

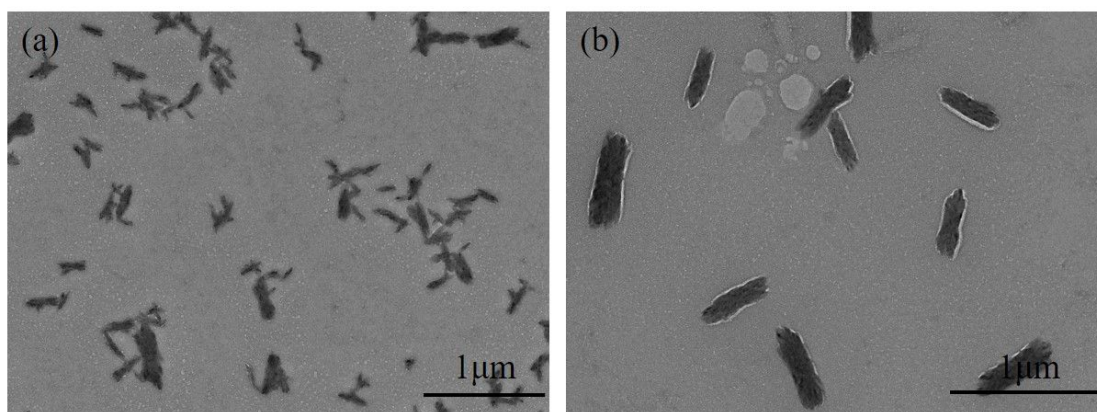

**Figure S4.** The TEM of 5-G/K/S.

The absorption peak of GO located at 232 nm is assigned to the  $\pi$ - $\pi^*$  transition of C=C bond. It has proved that the successful exfoliation of graphite oxide of 5-G/K.

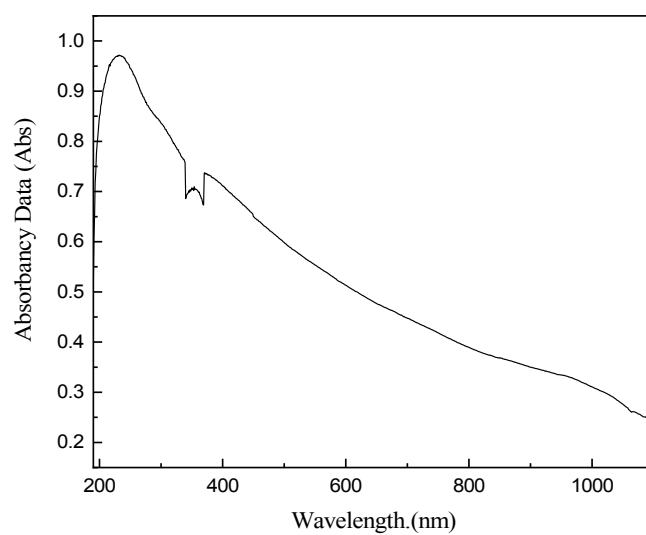

**Figure S5.** UV-vis spectra of 5-G/K.

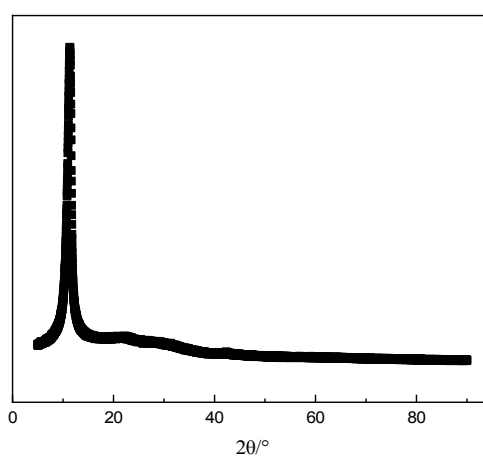

**Figure S6.** The XRD of GO.

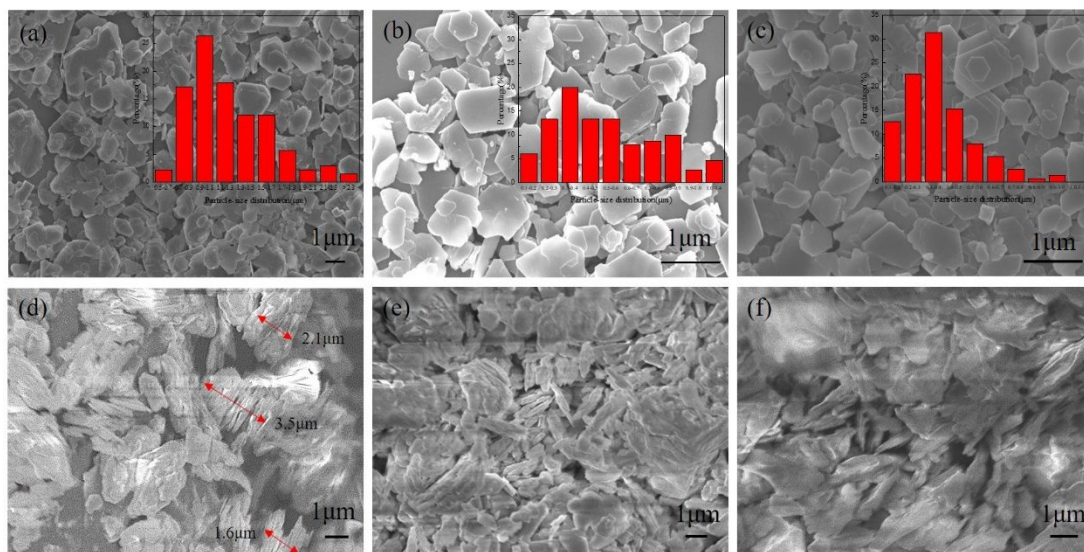

**Figure S7.** SEM images: Kaol (a, basal surface; d, lateral surface); 0-G/K/P (b, basal surface; e, lateral surface); 5-G/K/P (c, basal surface; f, lateral surface).

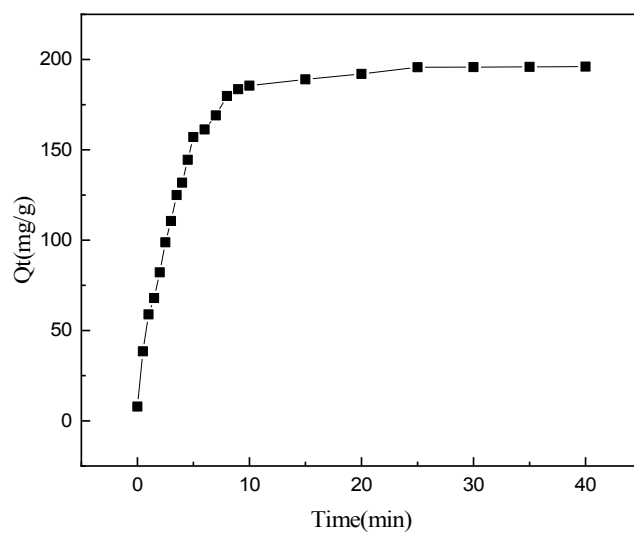

**Figure S8.** MB adsorption of GO at different times.

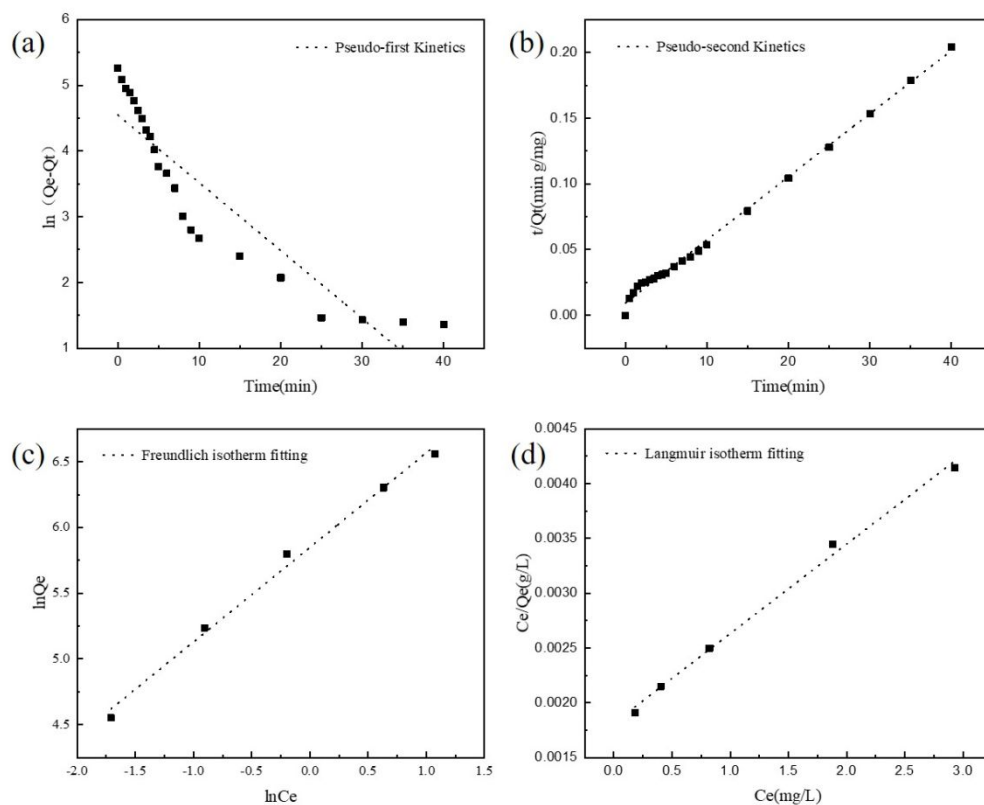

**Figure S9.** Adsorption kinetic of GO: (a) Pseudo-first-order kinetics model, (b) Pseudo-second kinetics model; Adsorption isotherms of GO: (c) Freundlich isotherm model, (d) Langmuir isotherm model.

**Table S1.** Adsorption kinetic parameters of MB onto 0-G/K/P, 5-G/K/P and GO.

| Models | Pseudo-first-order |                                        |                | Pseudo-second-order |                                                |                |
|--------|--------------------|----------------------------------------|----------------|---------------------|------------------------------------------------|----------------|
|        | Qe<br>(cal) (mg/g) | k <sub>1</sub><br>(min <sup>-1</sup> ) | R <sup>2</sup> | Qe<br>(cal) (mg/g)  | k <sub>2</sub> ×10 <sup>-3</sup><br>(g/mg min) | R <sup>2</sup> |
| 0-G/K  | 9.85               | 0.028                                  | 0.9361         | 62.5                | 6.50                                           | 0.9999         |
| 5-G/K  | 58.73              | 0.020                                  | 0.8469         | 90.91               | 0.83                                           | 0.9978         |
| GO     | 94.25              | 0.103                                  | 0.8355         | 208.77              | 2.41                                           | 0.9962         |

**Table S2.** Isotherm parameters for the adsorption of MB by 0-G/K/P, 5-G/K/P and GO.

| Isotherms | Freundlich                                    |       |                | Langmuir              |                       |                |
|-----------|-----------------------------------------------|-------|----------------|-----------------------|-----------------------|----------------|
|           | K <sub>F</sub> [(mg/g)(L/mg) <sup>1/n</sup> ] | 1/n   | R <sup>2</sup> | Q <sub>m</sub> (mg/g) | K <sub>L</sub> (L/mg) | R <sup>2</sup> |
| 0-G/K     | 15.92                                         | 0.423 | 0.960          | 111                   | 0.066                 | 0.998          |
| 5-G/K     | 26.31                                         | 0.268 | 0.980          | 250                   | 0.078                 | 0.995          |
| GO        | 346.54                                        | 0.719 | 0.993          | 1224                  | 0.451                 | 0.995          |
